# Supplementary material
Source: PubMed Central journal article supplement (PMC5860665)
Supplement: NIHMS925761-supplement-Supplemental_Info.pdf [file NIHMS925761-supplement-Supplemental_Info.pdf]

Supporting Information for

**Agglomeration Determines Effects of Carbonaceous Nanomaterials on Soybean  
Nodulation, Nitrogen Fixation Potential, and Growth in Soil**

Ying Wang<sup>†,‡,§</sup>, Chong Hyun Chang<sup>⊥</sup>, Dermont C. Bouchard<sup>||</sup>, Roger M. Nisbet<sup>‡,§,#</sup>, Joshua P. Schimel<sup>‡,§,#</sup>, Jorge L. Gardea-Torresdey<sup>§,∇</sup>, and Patricia A. Holden<sup>\*,†,‡,§</sup>

<sup>†</sup>Bren School of Environmental Science and Management, University of California, Santa Barbara, CA 93106, United States.

<sup>‡</sup>Earth Research Institute, University of California, Santa Barbara, CA 93106, United States.

<sup>§</sup>University of California Center for Environmental Implications of Nanotechnology, University of California, Santa Barbara, CA 93106, United States.

<sup>⊥</sup>University of California Center for Environmental Implications of Nanotechnology, California NanoSystems Institute, University of California, Los Angeles, CA 90095, United States.

<sup>||</sup>U.S. Environmental Protection Agency Office of Research and Development, National Exposure Research Laboratory, Athens, GA 30605, United States.

<sup>#</sup>Department of Ecology, Evolution and Marine Biology, University of California, Santa Barbara, CA 93106, United States.

<sup>∇</sup>Department of Chemistry, University of Texas at El Paso, El Paso, TX 79968, United States.

\*Corresponding Author: [holden@bren.ucsb.edu](mailto:holden@bren.ucsb.edu), 805-893-3195 (phone), 805-893-7612 (fax).

Number of Pages: 27

Number of Tables: 13

Number of Figures: 9

## **ADDITIONAL MATERIALS AND METHODS**

### **Calculation of CNM concentrations in soil solution for designing CNM stability studies**

To study the potential agglomeration states of CNMs in moist soil under conditions similar to the main experiment, suspensions of CNMs were prepared in an aqueous soil extract at CNM concentrations expected to occur in the soil solution of the main experiment. In the main experiment, the soil water content was 17.3% (soil dry mass basis) and was either un-amended (control) or amended with 0.1, 100 or 1000 mg kg<sup>-1</sup> (dry soil basis) of CB, MWCNTs or GNPs. Assuming that all CNMs were within the water phase of the soil and assuming a specific gravity of the soil solution equal to that of water (1 kg L<sup>-1</sup>), the CNM concentrations in the soil solution of the amended soils were calculated to be 0.58, 578 and 5780 mg L<sup>-1</sup> (for CNM soil amendments of 0.1, 100 or 1000 mg kg<sup>-1</sup> soil, respectively).

Based on the above calculations and the limits of the two instruments used to characterize CNM agglomeration and sedimentation (Zetasizer Nano-ZS90 and UV-1800 spectrophotometer), putative CNM colloidal stabilities in the soil solution were studied at CNM concentrations of 10 and 300 mg L<sup>-1</sup> in the soil extract. A 1:5 w/v (g moist soil per mL water) ratio was used to create the soil extract from unamended soils, following a published method for characterizing soil nitrogen and carbon contents.<sup>1</sup> The dry density of the soil was assumed to be 1.3 g cm<sup>-3</sup>.<sup>2</sup> Taking into account the dry soil volumetric displacement when suspending soil into 5 parts water, and taking into account the water content in the moist soil, the soil solution was diluted by approximately 39 times in the extract solution. If soil extracts had been prepared similarly using CNM-amended soils, then a similar dilution factor would apply and the CNM concentrations in the soil extracts would have been 0.015, 15 and 147 mg L<sup>-1</sup> (for CNM soil amendments of 0.1, 100 or 1000 mg kg<sup>-1</sup> soil, respectively). Thus, amending soil extract to 10 or

300 mg L<sup>-1</sup> CNM met two criteria for representativeness: similarity to experimental CNM concentrations in the soil solution, and reasonable proportionality of the original soil solution constituents to added CNMs.

Table S1. Physicochemical characterization of CNMs. CB = carbon black. MWCNTs = multi-walled carbon nanotubes. GNPs = graphene nanoplatelets.

|               | Specific Surface Area (m <sup>2</sup> g <sup>-1</sup> ) <sup>a</sup> | Size (nm) <sup>a</sup>                 | Diameter (nm) <sup>b</sup> | Primary Oxidation Temperature (°C) <sup>c</sup> | Non-carbon Impurity (wt %) <sup>c</sup> | Purity (wt %) <sup>a</sup> |
|---------------|----------------------------------------------------------------------|----------------------------------------|----------------------------|-------------------------------------------------|-----------------------------------------|----------------------------|
| <b>CB</b>     | 72 <sup>d</sup>                                                      | N/A                                    | 36.6 ± 8.3 <sup>d</sup>    | 619.9 ± 3.4 <sup>e</sup>                        | 1.34 ± 0.34 <sup>e</sup>                | > 99                       |
| <b>MWCNTs</b> | 110                                                                  | Diameter: 20–30<br>Length: 10000–30000 | 18.8 ± 4.1                 | 584.9 ± 3.8                                     | 2.17 ± 0.25                             | > 95                       |
| <b>GNPs</b>   | 600–750                                                              | Diameter: 2000<br>Thickness: 8–12      | 350 ± 320 (80–1600)        | 623.0 ± 0.2                                     | 1.03 ± 0.12                             | > 97                       |

<sup>a</sup> Reported by the manufacturer. <sup>b</sup> Measured from transmission electron microscopy (TEM) images following method reported in Ge et al.<sup>3</sup> <sup>c</sup> Measured by thermogravimetric analysis (TGA) following methods reported in Ge et al<sup>3</sup> and Mortimer et al<sup>4</sup>. <sup>d</sup> Previously reported in Ge et al.<sup>3</sup> <sup>e</sup> Within the range of previously reported values in Ge et al.<sup>3</sup> N/A not available.

Table S2. Metal content of CNMs (CB = carbon black, MWCNTs = multi-walled carbon nanotubes, GNPs = graphene nanoplatelets; wt %)<sup>a</sup>

| <b>Metal<sup>b</sup></b> | <b>CB</b>      | <b>MWCNTs</b> | <b>GNPs</b>   |
|--------------------------|----------------|---------------|---------------|
| <b>Al</b>                | 0.011 ± 0.000  | 0.003 ± 0.002 | 0.009 ± 0.002 |
| <b>As</b>                | - <sup>c</sup> | 0.003 ± 0.000 | -             |
| <b>B</b>                 | -              | 0.001 ± 0.000 | -             |
| <b>Ca</b>                | 0.011 ± 0.003  | 0.055 ± 0.008 | 0.010 ± 0.002 |
| <b>Co</b>                | -              | 0.002 ± 0.000 | -             |
| <b>Cr</b>                | -              | 0.004 ± 0.000 | -             |
| <b>Cu</b>                | -              | 0.001 ± 0.000 | 0.001 ± 0.000 |
| <b>Fe</b>                | 0.001 ± 0.000  | 0.012 ± 0.002 | 0.018 ± 0.002 |
| <b>La</b>                | 0.001 ± 0.000  | 0.089 ± 0.011 | -             |
| <b>Li</b>                | 0.001 ± 0.000  | 0.001 ± 0.000 | 0.001 ± 0.000 |
| <b>Mg</b>                | 0.001 ± 0.000  | 0.011 ± 0.001 | 0.006 ± 0.001 |
| <b>Mo</b>                | 0.012 ± 0.006  | 0.024 ± 0.013 | 0.008 ± 0.007 |
| <b>Na</b>                | 0.028 ± 0.001  | 0.001 ± 0.000 | 0.010 ± 0.002 |
| <b>Ni</b>                | -              | 0.927 ± 0.119 | -             |
| <b>Pb</b>                | -              | 0.006 ± 0.000 | 0.001 ± 0.000 |
| <b>Si</b>                | 0.005 ± 0.001  | 0.003 ± 0.001 | 0.010 ± 0.001 |
| <b>Th</b>                | 0.001 ± 0.000  | -             | -             |
| <b>V</b>                 | 0.002 ± 0.001  | 0.004 ± 0.002 | 0.001 ± 0.001 |
| <b>Yb</b>                | -              | 0.008 ± 0.001 | -             |
| <b>Zn</b>                | 0.001 ± 0.000  | 0.005 ± 0.001 | -             |

<sup>a</sup> Measured by inductively coupled plasma optical emission spectroscopy (ICP-OES) following method reported in Mortimer et al.<sup>4</sup> All data are shown as mean ±SE (n = 3). <sup>b</sup> The following metals were analyzed for, but were not detected: Ag, Ba, Be, Cd, Eu, Ho, Mn, Sb, Sc, Se, Sr, Tl, U. <sup>c</sup> Below detection limit.

Table S3. Soybean plant final stem length and stem elongation rate constant, according to treatment<sup>a</sup>

| <b>Treatment</b>  | <b>Final Stem Length (cm)</b> | <b>Stem Elongation Rate Constant (d<sup>-1</sup>)<sup>b</sup></b> | <b>End of Period (day) for Regression</b> | <b>Average R<sup>2</sup></b> |
|-------------------|-------------------------------|-------------------------------------------------------------------|-------------------------------------------|------------------------------|
| <b>Ctrl</b>       | 85.7 ± 2.5                    | 0.114 ± 0.008                                                     | 11 – 14                                   | 0.997                        |
| <b>CB_Low</b>     | 82.1 ± 2.1                    | 0.118 ± 0.010                                                     | 11 – 18                                   | 0.996                        |
| <b>CB_Med</b>     | 83.8 ± 1.4                    | 0.109 ± 0.005                                                     | 11 – 14                                   | 0.997                        |
| <b>CB_High</b>    | 83.1 ± 1.8                    | 0.114 ± 0.009                                                     | 11 – 14                                   | 0.995                        |
| <b>MWCNT_Low</b>  | 73.1 ± 2.7*                   | 0.111 ± 0.010                                                     | 11 – 14                                   | 0.989                        |
| <b>MWCNT_Med</b>  | 84.7 ± 1.4                    | 0.110 ± 0.007                                                     | 11 – 14                                   | 0.995                        |
| <b>MWCNT_High</b> | 87.3 ± 3.6                    | 0.125 ± 0.007                                                     | 11                                        | 0.998                        |
| <b>GNP_Low</b>    | 82.1 ± 1.7                    | 0.118 ± 0.006                                                     | 11 – 14                                   | 0.994                        |
| <b>GNP_Med</b>    | 84.5 ± 3.8                    | 0.120 ± 0.008                                                     | 7 – 14                                    | 0.998                        |
| <b>GNP_High</b>   | 83.7 ± 3.9                    | 0.127 ± 0.009                                                     | 11 – 14                                   | 0.988                        |

<sup>a</sup> Ctrl = control without nanomaterial amendment, CB = carbon black, MWCNT = multi-walled carbon nanotubes, and GNP = graphene nanoplatelets. Low, Med (medium), and High concentrations correspond to 0.1, 100, and 1000 mg kg<sup>-1</sup> nanomaterial on a dry soil basis. All data are shown as mean ±SE (n = 5 plants, except n = 4 for the Ctrl, CB\_High and MWCNT\_Low treatments). <sup>b</sup> Plant stem length elongation rate constant was calculated as the slope of a regression line from the linear region of the plot of the natural logarithm of stem length versus time (Figure 2A–C), where the initial time point was day 0 post transplantation and the final time point is the “End of Period (day) for Regression” (4<sup>th</sup> column from the left). \**P* < 0.05, as compared to the control.

Table S4. Soybean plant total leaf area at the final harvest, maximum leaf cover, and leaf cover expansion rate constant, according to treatment<sup>a</sup>

| <b>Treatment</b>  | <b>Final Total Leaf Area (cm<sup>2</sup>)</b> | <b>Max. Leaf Cover (% coverage of soil)</b> | <b>Leaf Cover Expansion Rate Constant (d<sup>-1</sup>)<sup>b</sup></b> | <b>End of Period (day) for Regression</b> | <b>Average R<sup>2</sup></b> |
|-------------------|-----------------------------------------------|---------------------------------------------|------------------------------------------------------------------------|-------------------------------------------|------------------------------|
| <b>Ctrl</b>       | 562.6 ± 23.4                                  | 185.9 ± 20.2                                | 0.197 ± 0.005                                                          | 14 – 22                                   | 0.996                        |
| <b>CB_Low</b>     | 519.0 ± 51.3                                  | 143.7 ± 21.7                                | 0.167 ± 0.017                                                          | 14 – 28                                   | 0.994                        |
| <b>CB_Med</b>     | 518.3 ± 35.5                                  | 183.3 ± 17.5                                | 0.172 ± 0.012                                                          | 14 – 22                                   | 0.986                        |
| <b>CB_High</b>    | 519.0 ± 61.4                                  | 165.3 ± 21.3                                | 0.152 ± 0.016                                                          | 14 – 28                                   | 0.971                        |
| <b>MWCNT_Low</b>  | 428.0 ± 41.7*                                 | 137.8 ± 15.7                                | 0.145 ± 0.012*                                                         | 14 – 28                                   | 0.942                        |
| <b>MWCNT_Med</b>  | 464.8 ± 7.7                                   | 177.2 ± 16.3                                | 0.173 ± 0.009                                                          | 14 – 22                                   | 0.993                        |
| <b>MWCNT_High</b> | 518.7 ± 27.9                                  | 170.6 ± 18.3                                | 0.181 ± 0.013                                                          | 14 – 22                                   | 0.977                        |
| <b>GNP_Low</b>    | 558.1 ± 17.2                                  | 164.2 ± 23.7                                | 0.164 ± 0.015                                                          | 14 – 28                                   | 0.982                        |
| <b>GNP_Med</b>    | 477.7 ± 24.6                                  | 186.8 ± 34.6                                | 0.162 ± 0.011                                                          | 14 – 28                                   | 0.989                        |
| <b>GNP_High</b>   | 569.7 ± 54.6                                  | 182.9 ± 19.6                                | 0.183 ± 0.008                                                          | 14 – 22                                   | 0.994                        |

<sup>a</sup> Ctrl = control without nanomaterial amendment, CB = carbon black, MWCNT = multi-walled carbon nanotubes, and GNP = graphene nanoplatelets. Low, Med (medium), and High concentrations correspond to 0.1, 100, and 1000 mg kg<sup>-1</sup> nanomaterial on a dry soil basis. All data are shown as mean ±SE (n = 5 plants, except n = 4 for the Ctrl, CB\_High and MWCNT\_Low treatments). <sup>b</sup> Leaf cover expansion rate constant was calculated as the slope of a regression line from the linear region of the plot of the natural logarithm of leaf cover versus time (Figure 2D–F), where the initial time point is day 0 post transplantation and the final time point is the “End of Period (day) for Regression” (5<sup>th</sup> column from the left).. \**P* < 0.05, as compared to the control.

Table S5. Soybean plant pod (total: all pods; mature: seed containing pods) count per plant (Figure S2), average seed count per pod, pod length, and pod width at the final harvest, according to treatment<sup>a</sup>

| Treatment         | Pod No. Per Plant |              | Seed Count Per Pod | Pod Length (cm) | Pod Width (cm) |
|-------------------|-------------------|--------------|--------------------|-----------------|----------------|
|                   | Total             | Mature       |                    |                 |                |
| <b>Ctrl</b>       | 9.8 ± 0.5         | 8.3 ± 0.3    | 1.6 ± 0.1          | 3.66 ± 0.17     | 1.11 ± 0.05    |
| <b>CB_Low</b>     | 10.0 ± 0.3        | 10.0 ± 0.3** | 1.8 ± 0.0          | 3.78 ± 0.10     | 1.25 ± 0.02    |
| <b>CB_Med</b>     | 10.6 ± 0.5        | 9.8 ± 0.2*   | 1.8 ± 0.1          | 3.60 ± 0.19     | 1.15 ± 0.04    |
| <b>CB_High</b>    | 11.8 ± 0.3*       | 10.3 ± 0.5** | 1.6 ± 0.0          | 3.58 ± 0.10     | 1.14 ± 0.05    |
| <b>MWCNT_Low</b>  | 8.5 ± 0.9         | 8.0 ± 0.4    | 1.6 ± 0.1          | 3.76 ± 0.10     | 1.19 ± 0.07    |
| <b>MWCNT_Med</b>  | 10.4 ± 0.9        | 9.4 ± 0.5    | 1.6 ± 0.1          | 3.52 ± 0.17     | 1.12 ± 0.03    |
| <b>MWCNT_High</b> | 14.4 ± 3.2        | 8.0 ± 1.5    | 1.3 ± 0.3          | 2.98 ± 0.48     | 0.97 ± 0.13    |
| <b>GNP_Low</b>    | 11.2 ± 0.5        | 9.8 ± 0.5    | 1.5 ± 0.1          | 3.54 ± 0.13     | 1.11 ± 0.05    |
| <b>GNP_Med</b>    | 9.8 ± 0.4         | 9.2 ± 0.5    | 1.7 ± 0.1          | 3.75 ± 0.08     | 1.16 ± 0.02    |
| <b>GNP_High</b>   | 10.8 ± 0.4        | 9.4 ± 0.7    | 1.6 ± 0.1          | 3.60 ± 0.19     | 1.13 ± 0.06    |

<sup>a</sup> Ctrl = control without nanomaterial amendment, CB = carbon black, MWCNT = multi-walled carbon nanotubes, and GNP = graphene nanoplatelets. Low, Med (medium), and High concentrations correspond to 0.1, 100, and 1000 mg kg<sup>-1</sup> nanomaterial on a dry soil basis. All data are shown as mean ±SE (n = 5 plants, except n = 4 for the Ctrl, CB\_High and MWCNT\_Low treatments). \**P* < 0.05, \*\**P* < 0.01, as compared to the control.



Table S6. Soybean plant part and total dry biomass (g plant<sup>-1</sup>) at the intermediate harvest, according to treatment<sup>a</sup>

| Treatment         | Stem        | Leaf        | Pod                        | Root        | Nodule          | Total       |
|-------------------|-------------|-------------|----------------------------|-------------|-----------------|-------------|
| <b>Ctrl</b>       | 0.70 ± 0.04 | 1.34 ± 0.07 | 0.003 ± 0.002 <sup>b</sup> | 0.21 ± 0.01 | 0.013 ± 0.001   | 2.27 ± 0.10 |
| <b>CB_Low</b>     | 0.78 ± 0.03 | 1.57 ± 0.06 | -                          | 0.23 ± 0.01 | 0.005 ± 0.001** | 2.58 ± 0.08 |
| <b>CB_Med</b>     | 0.72 ± 0.05 | 1.40 ± 0.11 | -                          | 0.23 ± 0.02 | 0.004 ± 0.001** | 2.36 ± 0.15 |
| <b>CB_High</b>    | 0.79 ± 0.06 | 1.59 ± 0.12 | -                          | 0.23 ± 0.02 | 0.009 ± 0.002   | 2.62 ± 0.18 |
| <b>MWCNT_Low</b>  | 0.66 ± 0.05 | 1.28 ± 0.15 | -                          | 0.19 ± 0.03 | 0.002 ± 0.000*  | 2.14 ± 0.22 |
| <b>MWCNT_Med</b>  | 0.68 ± 0.01 | 1.25 ± 0.05 | -                          | 0.21 ± 0.01 | 0.010 ± 0.004   | 2.15 ± 0.07 |
| <b>MWCNT_High</b> | 0.71 ± 0.04 | 1.38 ± 0.04 | -                          | 0.23 ± 0.01 | 0.009 ± 0.002   | 2.33 ± 0.09 |
| <b>GNP_Low</b>    | 0.73 ± 0.10 | 1.38 ± 0.19 | 0.005 <sup>c</sup>         | 0.23 ± 0.03 | 0.007 ± 0.002   | 2.34 ± 0.31 |
| <b>GNP_Med</b>    | 0.82 ± 0.01 | 1.49 ± 0.03 | 0.012 <sup>c</sup>         | 0.30 ± 0.03 | 0.012 ± 0.003   | 2.62 ± 0.03 |
| <b>GNP_High</b>   | 0.70 ± 0.02 | 1.39 ± 0.07 | -                          | 0.22 ± 0.01 | 0.013 ± 0.003   | 2.33 ± 0.09 |

<sup>a</sup> Ctrl = control without nanomaterial amendment, CB = carbon black, MWCNT = multi-walled carbon nanotubes, and GNP = graphene nanoplatelets. Low, Med (medium), and High concentrations correspond to 0.1, 100, and 1000 mg kg<sup>-1</sup> nanomaterial on a dry soil basis. All data are shown as mean ±SE (n = 3 plants, except that <sup>b</sup> n = 2 and <sup>c</sup> n = 1 individual plants formed pods at intermediate harvest). \**P* < 0.05, \*\**P* < 0.01, as compared to the control. - indicates that there were no pods present at the intermediate harvest.

Table S7. Soybean plant part and total dry biomass (g plant<sup>-1</sup>) at the final harvest, according to treatment<sup>a</sup>

| Treatment         | Stem        | Leaf        | Pod         | Root         | Nodule                   | Total       |
|-------------------|-------------|-------------|-------------|--------------|--------------------------|-------------|
| <b>Ctrl</b>       | 1.35 ± 0.03 | 2.29 ± 0.09 | 2.92 ± 0.06 | 0.32 ± 0.01  | 0.18 ± 0.01              | 7.06 ± 0.17 |
| <b>CB_Low</b>     | 1.34 ± 0.04 | 2.41 ± 0.11 | 3.09 ± 0.16 | 0.32 ± 0.01  | 0.06 ± 0.02***           | 7.21 ± 0.29 |
| <b>CB_Med</b>     | 1.36 ± 0.06 | 2.56 ± 0.14 | 3.10 ± 0.08 | 0.29 ± 0.03  | 0.04 ± 0.01***           | 7.36 ± 0.22 |
| <b>CB_High</b>    | 1.50 ± 0.07 | 2.53 ± 0.08 | 3.16 ± 0.08 | 0.30 ± 0.04  | 0.12 ± 0.01 <sup>b</sup> | 7.61 ± 0.20 |
| <b>MWCNT_Low</b>  | 1.14 ± 0.13 | 2.15 ± 0.25 | 2.57 ± 0.33 | 0.21 ± 0.03* | 0.01 ± 0.01***           | 6.08 ± 0.70 |
| <b>MWCNT_Med</b>  | 1.35 ± 0.03 | 2.28 ± 0.08 | 2.77 ± 0.08 | 0.35 ± 0.03  | 0.09 ± 0.02**            | 6.84 ± 0.21 |
| <b>MWCNT_High</b> | 1.39 ± 0.11 | 2.42 ± 0.25 | 2.52 ± 0.45 | 0.36 ± 0.03  | 0.08 ± 0.01***           | 6.77 ± 0.21 |
| <b>GNP_Low</b>    | 1.32 ± 0.12 | 2.36 ± 0.19 | 2.98 ± 0.06 | 0.37 ± 0.07  | 0.06 ± 0.02**            | 7.09 ± 0.38 |
| <b>GNP_Med</b>    | 1.28 ± 0.12 | 2.19 ± 0.18 | 2.83 ± 0.22 | 0.27 ± 0.04  | 0.11 ± 0.03              | 6.69 ± 0.56 |
| <b>GNP_High</b>   | 1.38 ± 0.07 | 2.36 ± 0.07 | 2.98 ± 0.06 | 0.32 ± 0.02  | 0.19 ± 0.01              | 7.23 ± 0.11 |

<sup>a</sup> Ctrl = control without nanomaterial amendment, CB = carbon black, MWCNT = multi-walled carbon nanotubes, and GNP = graphene nanoplatelets. Low, Med (medium), and High concentrations correspond to 0.1, 100, and 1000 mg kg<sup>-1</sup> nanomaterial on a dry soil basis. All data are shown as mean ±SE (n = 5 plants, except n = 4 for the Ctrl, CB\_High and MWCNT\_Low treatments). \**P* < 0.05, \*\**P* < 0.01, \*\*\**P* < 0.001, as compared to the control. <sup>b</sup> *P* = 0.06, as compared to the control.

Table S8. Soybean plant moisture content (g H<sub>2</sub>O g<sup>-1</sup> wet biomass) by each tissue type at the intermediate harvest, according to treatment<sup>a</sup>

| <b>Treatment</b>  | <b>Stem</b> | <b>Leaf</b> | <b>Pod</b>               | <b>Root</b> | <b>Nodule</b> |
|-------------------|-------------|-------------|--------------------------|-------------|---------------|
| <b>Ctrl</b>       | 0.79 ± 0.01 | 0.80 ± 0.01 | 0.83 ± 0.03 <sup>b</sup> | 0.79 ± 0.02 | 0.80 ± 0.01   |
| <b>CB_Low</b>     | 0.83 ± 0.00 | 0.81 ± 0.01 | -                        | 0.77 ± 0.08 | 0.79 ± 0.04   |
| <b>CB_Med</b>     | 0.80 ± 0.02 | 0.81 ± 0.01 | -                        | 0.85 ± 0.02 | 0.83 ± 0.01   |
| <b>CB_High</b>    | 0.81 ± 0.01 | 0.80 ± 0.00 | -                        | 0.84 ± 0.02 | 0.82 ± 0.01   |
| <b>MWCNT_Low</b>  | 0.83 ± 0.02 | 0.82 ± 0.01 | -                        | 0.86 ± 0.01 | 0.84 ± 0.01*  |
| <b>MWCNT_Med</b>  | 0.81 ± 0.00 | 0.81 ± 0.00 | -                        | 0.78 ± 0.07 | 0.82 ± 0.00   |
| <b>MWCNT_High</b> | 0.81 ± 0.01 | 0.80 ± 0.01 | -                        | 0.83 ± 0.03 | 0.83 ± 0.00   |
| <b>GNP_Low</b>    | 0.81 ± 0.01 | 0.81 ± 0.01 | 0.79 <sup>c</sup>        | 0.83 ± 0.02 | 0.82 ± 0.02   |
| <b>GNP_Med</b>    | 0.81 ± 0.01 | 0.81 ± 0.00 | 0.76 <sup>c</sup>        | 0.82 ± 0.02 | 0.83 ± 0.01   |
| <b>GNP_High</b>   | 0.80 ± 0.00 | 0.81 ± 0.00 | -                        | 0.80 ± 0.01 | 0.80 ± 0.01   |

<sup>a</sup> Ctrl = control without nanomaterial amendment, CB = carbon black, MWCNT = multi-walled carbon nanotubes, and GNP = graphene nanoplatelets. Low, Med (medium), and High concentrations correspond to 0.1, 100, and 1000 mg kg<sup>-1</sup> nanomaterial on a dry soil basis. All data are shown as mean ±SE (n = 3 plants, except that <sup>b</sup> n = 2 and <sup>c</sup> n = 1 individual plants formed pods at the intermediate harvest). \**P* < 0.05, as compared to the control. - indicates that there were no pods present at the intermediate harvest.

Table S9. Soybean plant moisture content (g H<sub>2</sub>O g<sup>-1</sup> wet biomass) by each tissue type at the final harvest, according to treatment<sup>a</sup>

| <b>Treatment</b>  | <b>Stem</b> | <b>Leaf</b> | <b>Pod</b>  | <b>Root</b> | <b>Nodule</b> |
|-------------------|-------------|-------------|-------------|-------------|---------------|
| <b>Ctrl</b>       | 0.67 ± 0.00 | 0.76 ± 0.01 | 0.77 ± 0.00 | 0.78 ± 0.05 | 0.77 ± 0.01   |
| <b>CB_Low</b>     | 0.67 ± 0.00 | 0.74 ± 0.00 | 0.77 ± 0.00 | 0.78 ± 0.02 | 0.76 ± 0.02   |
| <b>CB_Med</b>     | 0.67 ± 0.00 | 0.74 ± 0.01 | 0.78 ± 0.00 | 0.81 ± 0.02 | 0.77 ± 0.01   |
| <b>CB_High</b>    | 0.66 ± 0.00 | 0.74 ± 0.00 | 0.78 ± 0.00 | 0.80 ± 0.04 | 0.78 ± 0.01   |
| <b>MWCNT_Low</b>  | 0.71 ± 0.01 | 0.74 ± 0.01 | 0.78 ± 0.01 | 0.81 ± 0.04 | 0.80 ± 0.01   |
| <b>MWCNT_Med</b>  | 0.67 ± 0.00 | 0.75 ± 0.00 | 0.78 ± 0.00 | 0.79 ± 0.03 | 0.77 ± 0.01   |
| <b>MWCNT_High</b> | 0.67 ± 0.01 | 0.74 ± 0.02 | 0.77 ± 0.01 | 0.81 ± 0.03 | 0.78 ± 0.00   |
| <b>GNP_Low</b>    | 0.68 ± 0.01 | 0.74 ± 0.01 | 0.78 ± 0.00 | 0.79 ± 0.03 | 0.79 ± 0.01   |
| <b>GNP_Med</b>    | 0.68 ± 0.01 | 0.75 ± 0.01 | 0.78 ± 0.01 | 0.76 ± 0.05 | 0.78 ± 0.01   |
| <b>GNP_High</b>   | 0.68 ± 0.01 | 0.75 ± 0.00 | 0.78 ± 0.00 | 0.81 ± 0.02 | 0.77 ± 0.01   |

<sup>a</sup> Ctrl = control without nanomaterial amendment, CB = carbon black, MWCNT = multi-walled carbon nanotubes, and GNP = graphene nanoplatelets. Low, Med (medium), and High concentrations correspond to 0.1, 100, and 1000 mg kg<sup>-1</sup> nanomaterial on a dry soil basis. All data are shown as mean ±SE (n = 5 plants, except n = 4 for the Ctrl, CB\_High and MWCNT\_Low treatments).

Table S10. Soybean plant nodule count per plant, dry biomass per nodule, N<sub>2</sub> fixation potential (normalized to dry nodule biomass) and whole-plant N<sub>2</sub> fixation potential, at the intermediate harvest, according to treatment<sup>a</sup>

| <b>Treatment</b>  | <b>Nodule Count<br/>(No. per plant)</b> | <b>Dry Biomass<br/>Per Nodule<br/>(mg)</b> | <b>N<sub>2</sub> Fixation Potential<br/>(E-8 mol ethylene min<sup>-1</sup> g<sup>-1</sup>)</b> | <b>Whole-plant N<sub>2</sub> Fixation Potential<br/>(E-9 mol ethylene min<sup>-1</sup> plant<sup>-1</sup>)<sup>b</sup></b> |
|-------------------|-----------------------------------------|--------------------------------------------|------------------------------------------------------------------------------------------------|----------------------------------------------------------------------------------------------------------------------------|
| <b>Ctrl</b>       | 44.3 ± 2.3                              | 0.30 ± 0.01                                | 9.35 ± 1.91                                                                                    | 1.26 ± 0.33                                                                                                                |
| <b>CB_Low</b>     | 27.0 ± 3.5**                            | 0.20 ± 0.02                                | 1.83 ± 1.83                                                                                    | 0.12 ± 0.12                                                                                                                |
| <b>CB_Med</b>     | 28.3 ± 3.2*                             | 0.13 ± 0.02**                              | 2.00 ± 2.00                                                                                    | 0.11 ± 0.11                                                                                                                |
| <b>CB_High</b>    | 33.7 ± 1.8                              | 0.27 ± 0.04                                | 8.21 ± 3.47                                                                                    | 0.83 ± 0.46                                                                                                                |
| <b>MWCNT_Low</b>  | 13.0 ± 1.2**                            | 0.12 ± 0.02*                               | 0**                                                                                            | 0*                                                                                                                         |
| <b>MWCNT_Med</b>  | 41.3 ± 1.8                              | 0.23 ± 0.08                                | 3.06 ± 1.59                                                                                    | 0.33 ± 0.18                                                                                                                |
| <b>MWCNT_High</b> | 38.7 ± 8.4                              | 0.23 ± 0.03                                | 5.06 ± 1.59                                                                                    | 0.51 ± 0.22                                                                                                                |
| <b>GNP_Low</b>    | 45.0 ± 2.0                              | 0.16 ± 0.03                                | 5.28 ± 3.23                                                                                    | 0.50 ± 0.34                                                                                                                |
| <b>GNP_Med</b>    | 43.3 ± 6.4                              | 0.28 ± 0.05                                | 12.61 ± 5.30                                                                                   | 1.86 ± 0.88                                                                                                                |
| <b>GNP_High</b>   | 41.7 ± 9.0                              | 0.32 ± 0.07                                | 6.84 ± 3.45                                                                                    | 0.88 ± 0.44                                                                                                                |

<sup>a</sup> Ctrl = control without nanomaterial amendment, CB = carbon black, MWCNT = multi-walled carbon nanotubes, and GNP = graphene nanoplatelets. Low, Med (medium), and High concentrations correspond to 0.1, 100, and 1000 mg kg<sup>-1</sup> nanomaterial on a dry soil basis. All data are shown as mean ±SE (n = 3 plants). <sup>b</sup> Calculated as the product of the dry nodule biomass per plant (Table S6) and the N<sub>2</sub> fixation potential which had been normalized to dry nodule biomass at the intermediate harvest. Calculation was made for each individual plant, with the mean and SE calculated for each treatment. \**P* < 0.05, \*\**P* < 0.01, as compared to the control.

Table S11. Soybean plant nodule count per plant, dry biomass per nodule, N<sub>2</sub> fixation potential (normalized to dry nodule biomass) and whole-plant N<sub>2</sub> fixation potential, at the final harvest, according to treatment<sup>a</sup>

| Treatment         | Nodule Count<br>(No. per plant) | Dry Biomass<br>per Nodule<br>(mg) | N <sub>2</sub> Fixation Potential<br>(E-7 mol ethylene min <sup>-1</sup> g <sup>-1</sup> ) | Whole-plant N <sub>2</sub> Fixation Potential<br>(E-8 mol ethylene min <sup>-1</sup> plant <sup>-1</sup> ) <sup>b</sup> |
|-------------------|---------------------------------|-----------------------------------|--------------------------------------------------------------------------------------------|-------------------------------------------------------------------------------------------------------------------------|
| <b>Ctrl</b>       | 50.0 ± 4.8                      | 3.6 ± 0.2                         | 5.08 ± 1.19                                                                                | 9.28 ± 2.60                                                                                                             |
| <b>CB_Low</b>     | 35.6 ± 4.9                      | 1.5 ± 0.3***                      | 1.51 ± 0.51**                                                                              | 0.77 ± 0.37***                                                                                                          |
| <b>CB_Med</b>     | 27.4 ± 3.8*                     | 1.4 ± 0.2***                      | 2.18 ± 0.42*                                                                               | 0.86 ± 0.24***                                                                                                          |
| <b>CB_High</b>    | 41.5 ± 4.3                      | 2.9 ± 0.1                         | 4.06 ± 0.31                                                                                | 4.94 ± 0.80                                                                                                             |
| <b>MWCNT_Low</b>  | 24.0 ± 4.3*                     | 0.4 ± 0.1***                      | 1.01 ± 0.56**                                                                              | 0.21 ± 0.18***                                                                                                          |
| <b>MWCNT_Med</b>  | 45.6 ± 6.2                      | 1.9 ± 0.3***                      | 2.98 ± 0.53                                                                                | 2.56 ± 0.63**                                                                                                           |
| <b>MWCNT_High</b> | 46.0 ± 3.8                      | 1.8 ± 0.1***                      | 2.25 ± 0.61                                                                                | 1.80 ± 0.49**                                                                                                           |
| <b>GNP_Low</b>    | 26.4 ± 3.5 <sup>c</sup>         | 2.3 ± 0.5                         | 3.97 ± 0.14                                                                                | 3.55 ± 2.20                                                                                                             |
| <b>GNP_Med</b>    | 48.4 ± 8.9                      | 2.2 ± 0.5                         | 2.30 ± 0.71                                                                                | 2.96 ± 0.94                                                                                                             |
| <b>GNP_High</b>   | 65.4 ± 4.8                      | 2.9 ± 0.2                         | 2.64 ± 0.68                                                                                | 4.98 ± 1.35                                                                                                             |

<sup>a</sup> Ctrl = control without nanomaterial amendment, CB = carbon black, MWCNT = multi-walled carbon nanotubes, and GNP = graphene nanoplatelets. Low, Med (medium), and High concentrations correspond to 0.1, 100, and 1000 mg kg<sup>-1</sup> nanomaterial on a dry soil basis. All data are shown as mean ±SE (n = 5 plants, except n = 4 for the Ctrl, CB\_High and MWCNT\_Low treatments).

<sup>b</sup> Calculated as the product of the dry nodule biomass per plant (Table S7) and the N<sub>2</sub> fixation potential which had been normalized to dry nodule biomass at the final harvest. Calculation was made for each individual plant, with the mean and SE calculated for each treatment. \**P* < 0.05, \*\**P* < 0.01, \*\*\**P* < 0.001, as compared to the control. <sup>c</sup> *P* = 0.07, as compared to the control.

Table S12. Soil characteristics

| Characteristic                                                                  | Result <sup>a</sup> | Analytical Method Reference |
|---------------------------------------------------------------------------------|---------------------|-----------------------------|
| Saturation water content (%)                                                    | 41.00               | 5                           |
| pH                                                                              | 7.38 (7.36–7.40)    | 6                           |
| Estimated Soluble Salts (EC, dS m <sup>-1</sup> )                               | 2.65 (2.65–2.65)    | 5                           |
| Ca, (saturated paste extract, meq L <sup>-1</sup> )                             | 8.01 (7.97–8.05)    | 7-8                         |
| Mg, (saturated paste extract, meq L <sup>-1</sup> )                             | 16.67 (16.58–16.75) | 7-8                         |
| Na, (saturated paste extract, meq L <sup>-1</sup> )                             | 3.63 (3.61–3.65)    | 7-8                         |
| Cl, (saturated paste extract, meq L <sup>-1</sup> )                             | 4.34 (4.30–4.37)    | 5                           |
| B, (saturated paste extract, mg L <sup>-1</sup> )                               | 0.12                | 7-8                         |
| HCO <sub>3</sub> <sup>-</sup> , (saturated paste extract, meq L <sup>-1</sup> ) | 0.4                 | 9                           |
| CO <sub>3</sub> <sup>2-</sup> , (saturated paste extract, meq L <sup>-1</sup> ) | <0.1                | 9                           |
| Total N (%)                                                                     | 0.152 (0.149–0.154) | 10                          |
| Total C (%)                                                                     | 1.53 (1.52–1.54)    | 10                          |
| NH <sub>4</sub> <sup>+</sup> (N, extractable, ppm)                              | 1.82                | 11-12                       |
| NO <sub>3</sub> <sup>-</sup> (N, extractable, ppm)                              | 44.45               | 12-13                       |
| P (Olsen, extractable, ppm)                                                     | 15.1 (14.7–15.4)    | 14-15                       |
| K (exchangeable, ppm)                                                           | 498 (495–501)       | 16                          |
| K (exchangeable, meq per 100 g)                                                 | 1.28 (1.27–1.28)    | 16                          |
| Na (exchangeable, ppm)                                                          | 91 (90–91)          | 16                          |
| Na (exchangeable, meq per 100 g)                                                | 0.39 (0.39–0.39)    | 16                          |
| Ca (exchangeable, meq per 100 g)                                                | 8.85 (8.82–8.88)    | 16                          |
| Mg (exchangeable, meq per 100 g)                                                | 12.1 (12.0–12.1)    | 16                          |
| Cation Exchange Capacity (CEC, meq per 100 g)                                   | 22.6 (22.4–22.7)    | 16                          |
| Organic Matter (loss on ignition, LOI, %)                                       | 3.03 (3.02–3.03)    | 17                          |
| Zn (DTPA extraction, ppm)                                                       | 0.8 (0.7–0.8)       | 18                          |
| Mn (DTPA extraction, ppm)                                                       | 108 (102–113)       | 18                          |
| Cu (DTPA extraction, ppm)                                                       | 0.9 (0.9–0.9)       | 18                          |
| Fe (DTPA extraction, ppm)                                                       | 146 (142–150)       | 18                          |
| Zn (Total, ppm)                                                                 | 55 (54–56)          | 19                          |
| Mn (Total, ppm)                                                                 | 685 (675–695)       | 19                          |
| Fe (Total, ppm)                                                                 | 31250 (30500–32000) | 19                          |
| Cu (Total, ppm)                                                                 | 28 (27–28)          | 19                          |
| Sand (%)                                                                        | 55                  | 20                          |
| Silt (%)                                                                        | 25                  | 20                          |
| Clay (%)                                                                        | 20                  | 20                          |

<sup>a</sup> Data are shown as mean with results from duplicate measurements (of separate soil subsamples) in parentheses. For saturation water content, B, HCO<sub>3</sub><sup>-</sup>, CO<sub>3</sub><sup>2-</sup>, NH<sub>4</sub><sup>+</sup>, NO<sub>3</sub><sup>-</sup>, sand, silt and clay, only a single measurement was made.

Table S13. Zeta ( $\zeta$ ) potential and electrophoretic mobility of the filtered soil extract, or of filtered soil extract containing 10 mg L<sup>-1</sup> of either CB, MWCNTs or GNPs<sup>a</sup>

|                              | $\zeta$ Potential (mV) | Electrophoretic Mobility<br>(10 <sup>-8</sup> m <sup>2</sup> V <sup>-1</sup> s <sup>-1</sup> ) |
|------------------------------|------------------------|------------------------------------------------------------------------------------------------|
| Soil Extract Only            | -17.4 ± 0.7            | -1.364 ± 0.052                                                                                 |
| 10 mg L <sup>-1</sup> CB     | -21.8 ± 0.3            | -1.707 ± 0.025                                                                                 |
| 10 mg L <sup>-1</sup> MWCNTs | -20.4 ± 0.3            | -1.600 ± 0.026                                                                                 |
| 10 mg L <sup>-1</sup> GNPs   | -17.4 ± 0.2            | -1.364 ± 0.015                                                                                 |

<sup>a</sup> All data are shown as mean ±SE (n=6). CB = carbon black, MWCNT = multi-walled carbon nanotubes, and GNP = graphene nanoplatelets.



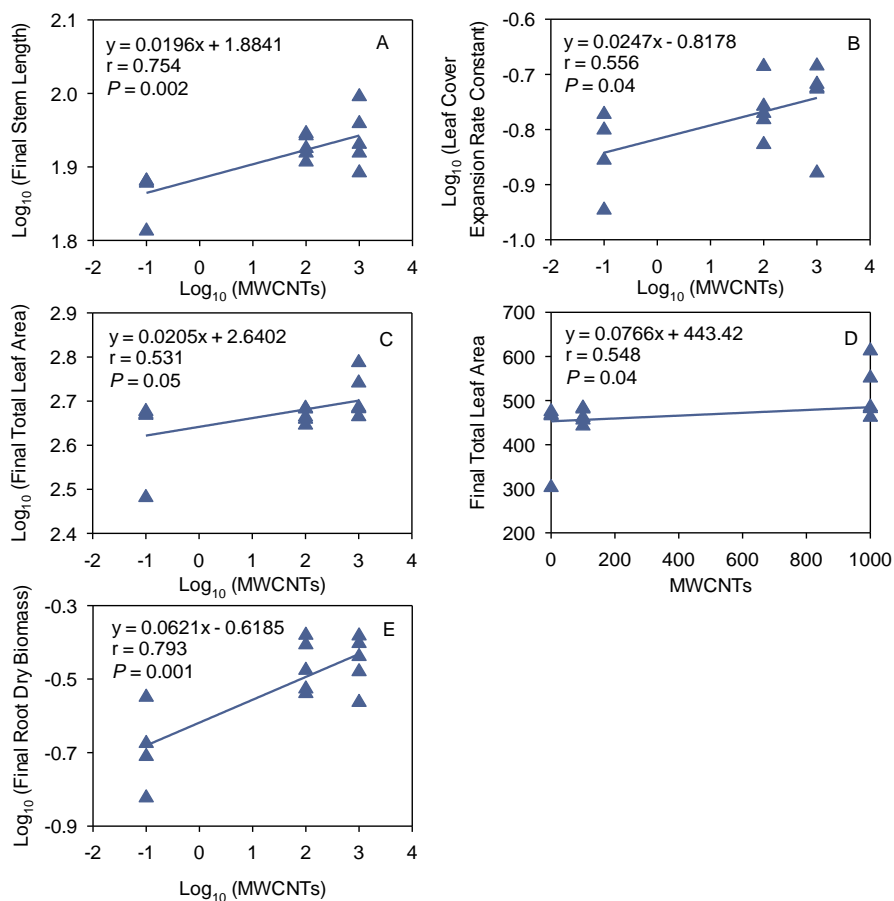

Figure S1. Summary of significant inverse dose-response relationships between multi-walled carbon nanotube (MWCNT) soil concentration and (A) final stem length, (B) leaf cover expansion rate constant, (C–D) final total leaf area, and (E) final dry root biomass. In all graphs (A–E), the control is excluded. MWCNT concentrations were 0.1, 100, and 1000 mg kg<sup>-1</sup> nanomaterial on a dry soil basis. For each treatment, n = 5 plants, except n = 4 for the 0.1 mg kg<sup>-1</sup> MWCNT treatment. Solid regression lines and the associated line equations within each graph provide the correlation results, including correlation coefficients (r) with significances (P). For the final stem length (A), leaf cover expansion rate constant (B) and final dry root biomass (E), correlations were significant when data were fitted by power models; hence data for both the x and y-axes of (A), (B) and (E) were logarithmically transformed. For the final total leaf area, the correlations were significant when fitted by either a power (C) or a linear (D) function.

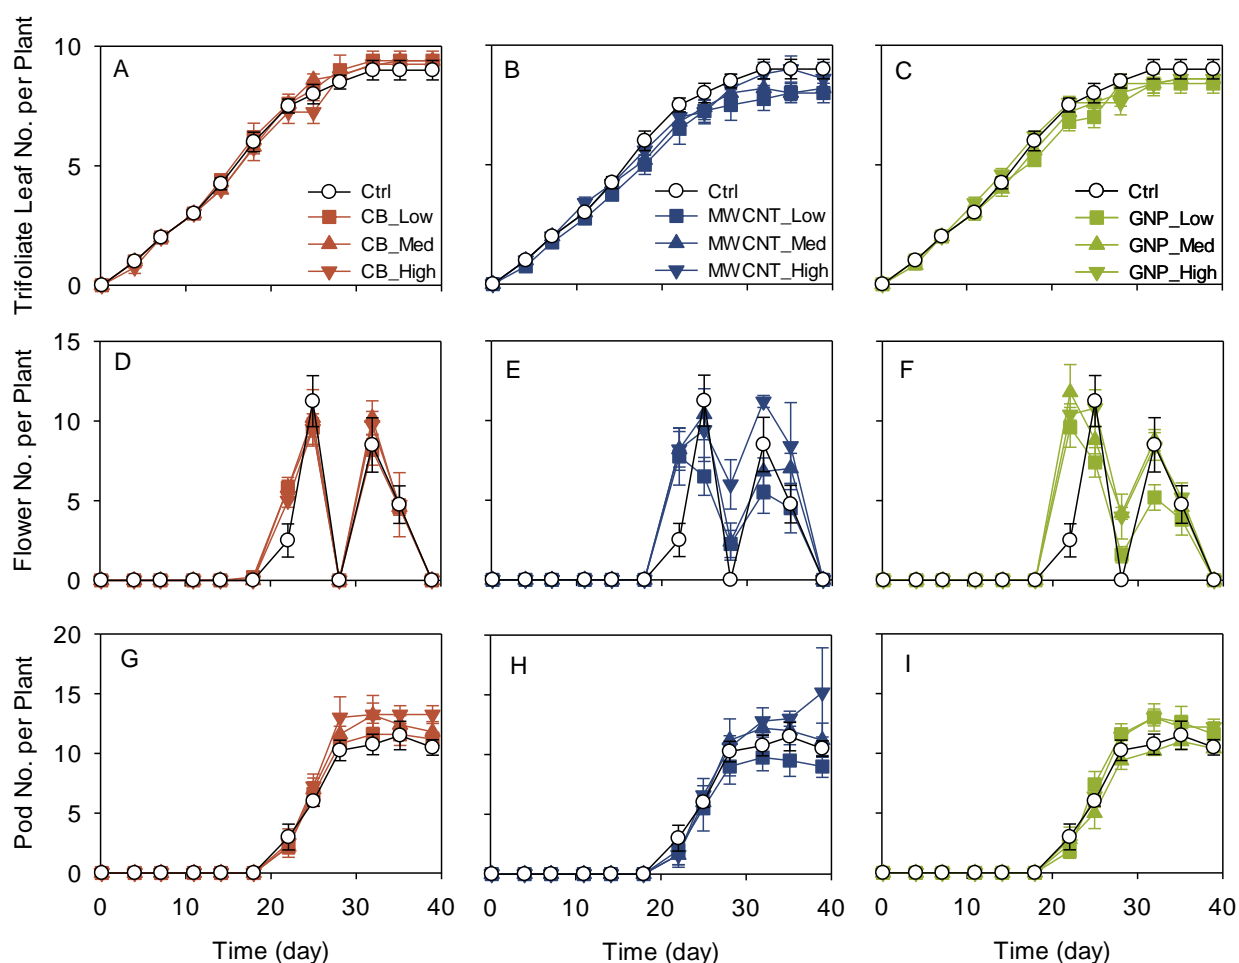

Figure S2. Time course of soybean plant vegetative and reproductive development post transplantation according to either (A–C) trifoliolate leaf, (D–F) flower or (G–I) pod count per plant. Ctrl = control without nanomaterial amendment, CB = carbon black, MWCNT = multi-walled carbon nanotubes, and GNP = graphene nanoplatelets. Low, Med (medium), and High concentrations correspond to 0.1, 100, and 1000 mg kg<sup>-1</sup> nanomaterial on a dry soil basis. Error bars are  $\pm$ SE (n = 5 plants, except n = 4 for the Ctrl, CB\_High and MWCNT\_Low treatments).

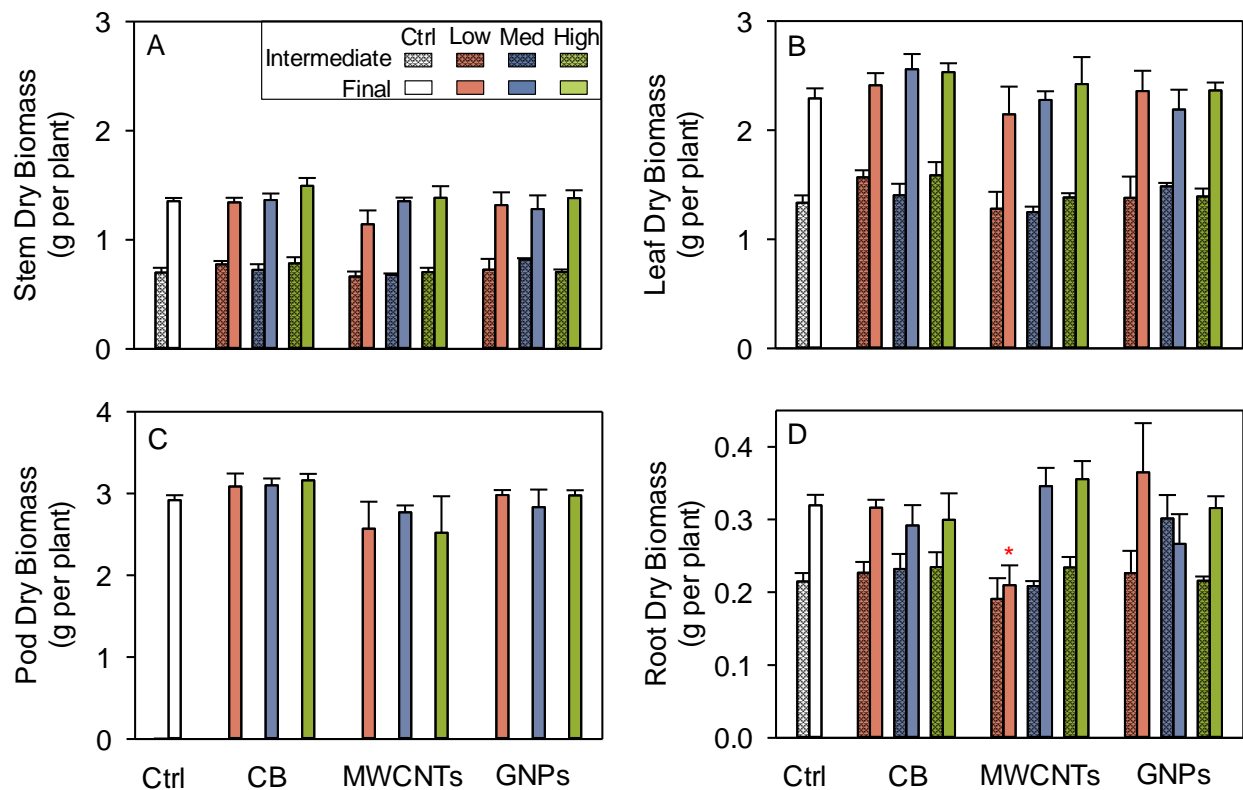

Figure S3. Soybean (A) stem, (B) leaf, (C) pod and (D) root dry biomass according to treatment, at the intermediate (Table S6) and final (Table S7) harvests, respectively. Ctrl = control without nanomaterial amendment, CB = carbon black, MWCNT = multi-walled carbon nanotubes, and GNP = graphene nanoplatelets. Low, Med (medium), and High concentrations correspond to 0.1, 100, and 1000 mg kg<sup>-1</sup> nanomaterial on a dry soil basis. Error bars are  $\pm$ SE (n = 3 plants at intermediate harvest; n = 5 plants, except n = 4 for the Ctrl, CB\_High and MWCNT\_Low treatments at the final harvest). \**P* < 0.05, as compared to the control (red \*: final harvest).

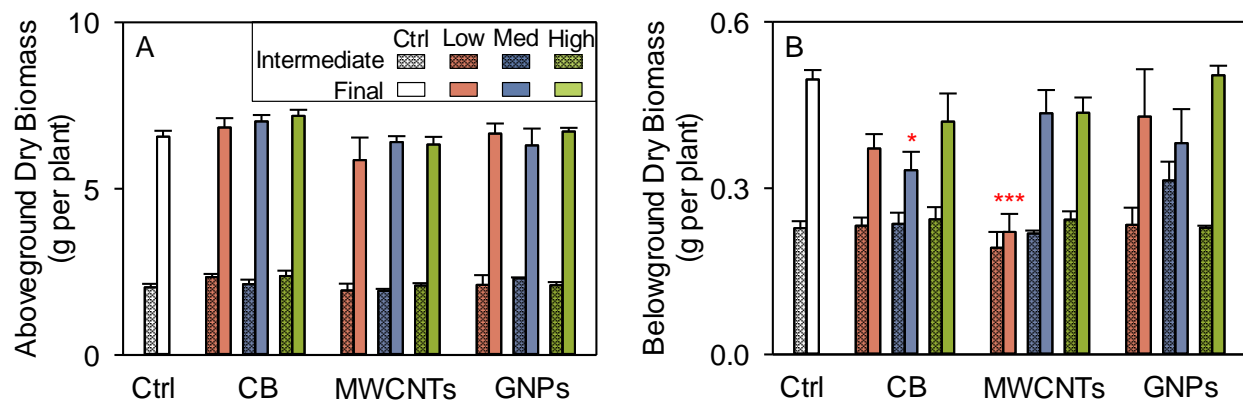

Figure S4. Soybean (A) aboveground and (B) belowground dry biomass at the intermediate and final harvests, respectively. Aboveground biomass was calculated as the sum of stem, leaf, and pod biomasses (Tables S6 and S7). Belowground biomass was calculated as the sum of root and nodule biomasses (Tables S6 and S7). Ctrl = control without nanomaterial amendment, CB = carbon black, MWCNT = multi-walled carbon nanotubes, and GNP = graphene nanoplatelets. Low, Med (medium), and High concentrations correspond to 0.1, 100, and 1000 mg kg<sup>-1</sup> nanomaterial on a dry soil basis. Error bars are  $\pm$ SE (n = 3 plants at the intermediate harvest; n = 5 plants, except n = 4 for the Ctrl, CB\_High and MWCNT\_Low treatments at the final harvest). \* $P$  < 0.05, \*\*\* $P$  < 0.001, as compared to the control (red \*: final harvest).

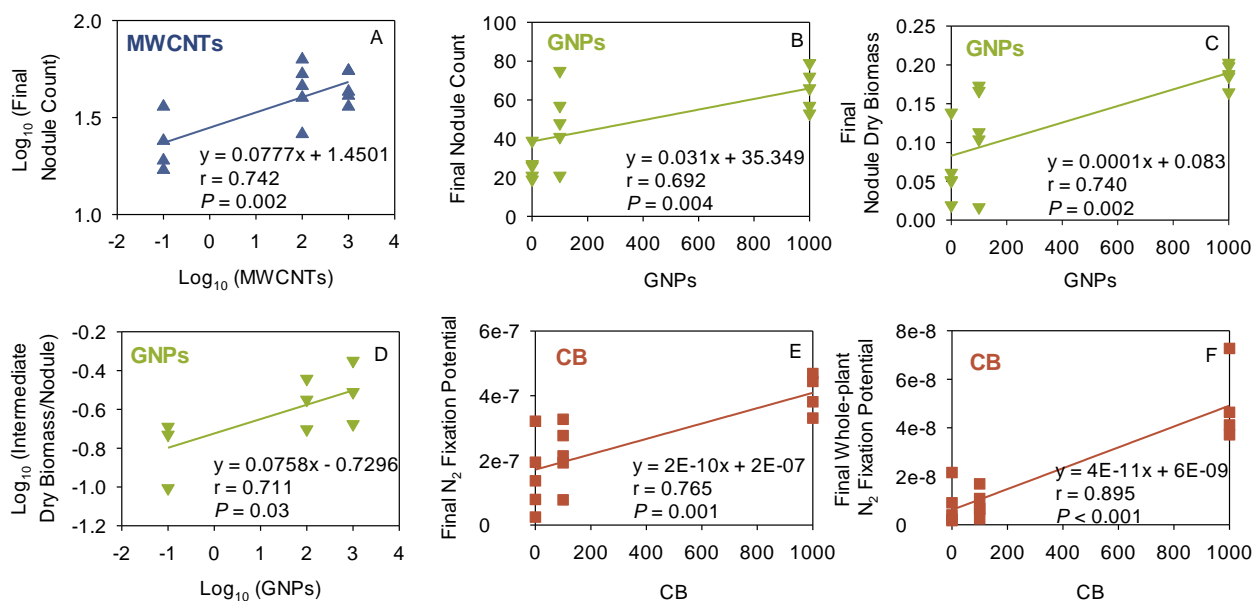

Figure S5. Summary of significant inverse dose-response relationships (ANOVA,  $P < 0.05$ ) between CNM soil concentration and (A–B) final nodule count (Table S11), (C) final dry nodule biomass per plant (Table S7), (D) intermediate dry biomass per nodule (Table S10), (E) final  $N_2$  fixation potential, and (F) final whole-plant  $N_2$  fixation potential (Table S11). In all graphs, the control is excluded. CB = carbon black (red squares), MWCNTs = multi-walled carbon nanotubes (blue up triangles), and GNPs = graphene nanoplatelets (green down triangles). CNM concentrations were 0.1, 100, and 1000  $mg\ kg^{-1}$  nanomaterial on a dry soil basis. For each treatment,  $n = 3$  plants at the intermediate harvest;  $n = 5$  plants, except  $n = 4$  for the 1000  $mg\ kg^{-1}$  CB and 0.1  $mg\ kg^{-1}$  MWCNT treatments at the final harvest. Solid regression lines and the associated line equations within each graph provide the correlation results, including correlation coefficients ( $r$ ) with significances ( $P$ ). For the CB treatments, both the significant correlations were fitted by linear models (E and F). However, for the MWCNT treatments, the correlation was significant when data were fitted by a power model; hence data for both the x and y-axes of the figure (A) for MWCNT treatments were logarithmically transformed. For the GNP treatments, the final nodule count (B) and final dry nodule biomass (C) were fitted by linear models, while the intermediate dry biomass per nodule (D) was better fitted by a power function.

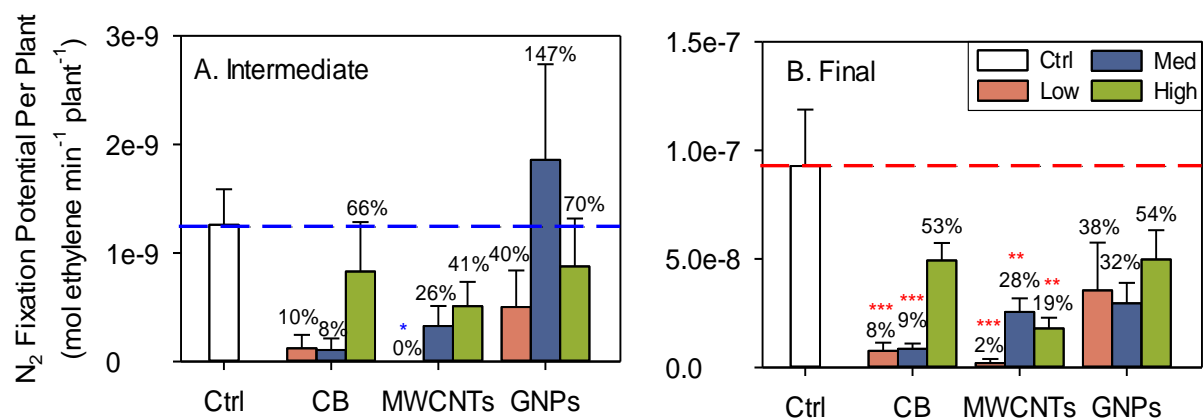

Figure S6. Whole-plant N<sub>2</sub> fixation potential (mol ethylene min<sup>-1</sup> plant<sup>-1</sup>), calculated as the product of the dry nodule biomass per plant (Figure 3B; Tables S6 and S7) and the N<sub>2</sub> fixation potential which had been normalized to dry nodule biomass (Figure 3D; Tables S10 and S11), according to treatment, at (A) the intermediate and (B) the final harvests. Ctrl = control without nanomaterial amendment, CB = carbon black, MWCNT = multi-walled carbon nanotubes, and GNP = graphene nanoplatelets. Low, Med (medium), and High concentrations correspond to 0.1, 100, and 1000 mg kg<sup>-1</sup> nanomaterial on a dry soil basis. Error bars are ±SE (n = 3 plants at the intermediate harvest; n = 5 plants, except n = 4 for the Ctrl, CB\_High and MWCNT\_Low treatments at the final harvest). Calculation of the whole-plant N<sub>2</sub> fixation potential was made for each individual plant, with the mean and SE calculated for each treatment. Dashed lines indicate control levels, with numbers above each bar representing the percentage relative to the control. \**P* < 0.05, \*\**P* < 0.01, \*\*\**P* < 0.001, as compared to the control (blue \*: intermediate, red \*: final).

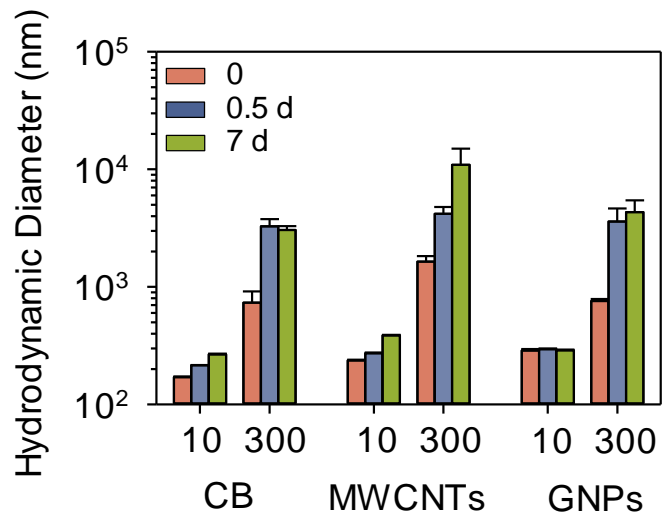

Figure S7. Hydrodynamic diameters of 10 and 300 mg L<sup>-1</sup> carbon black (CB), multi-walled carbon nanotubes (MWCNTs) or graphene nanoplatelets (GNPs) in the filtered soil extract as measured by dynamic light scattering (DLS) over 7 d. Error bars are  $\pm$ SE (n = 3).

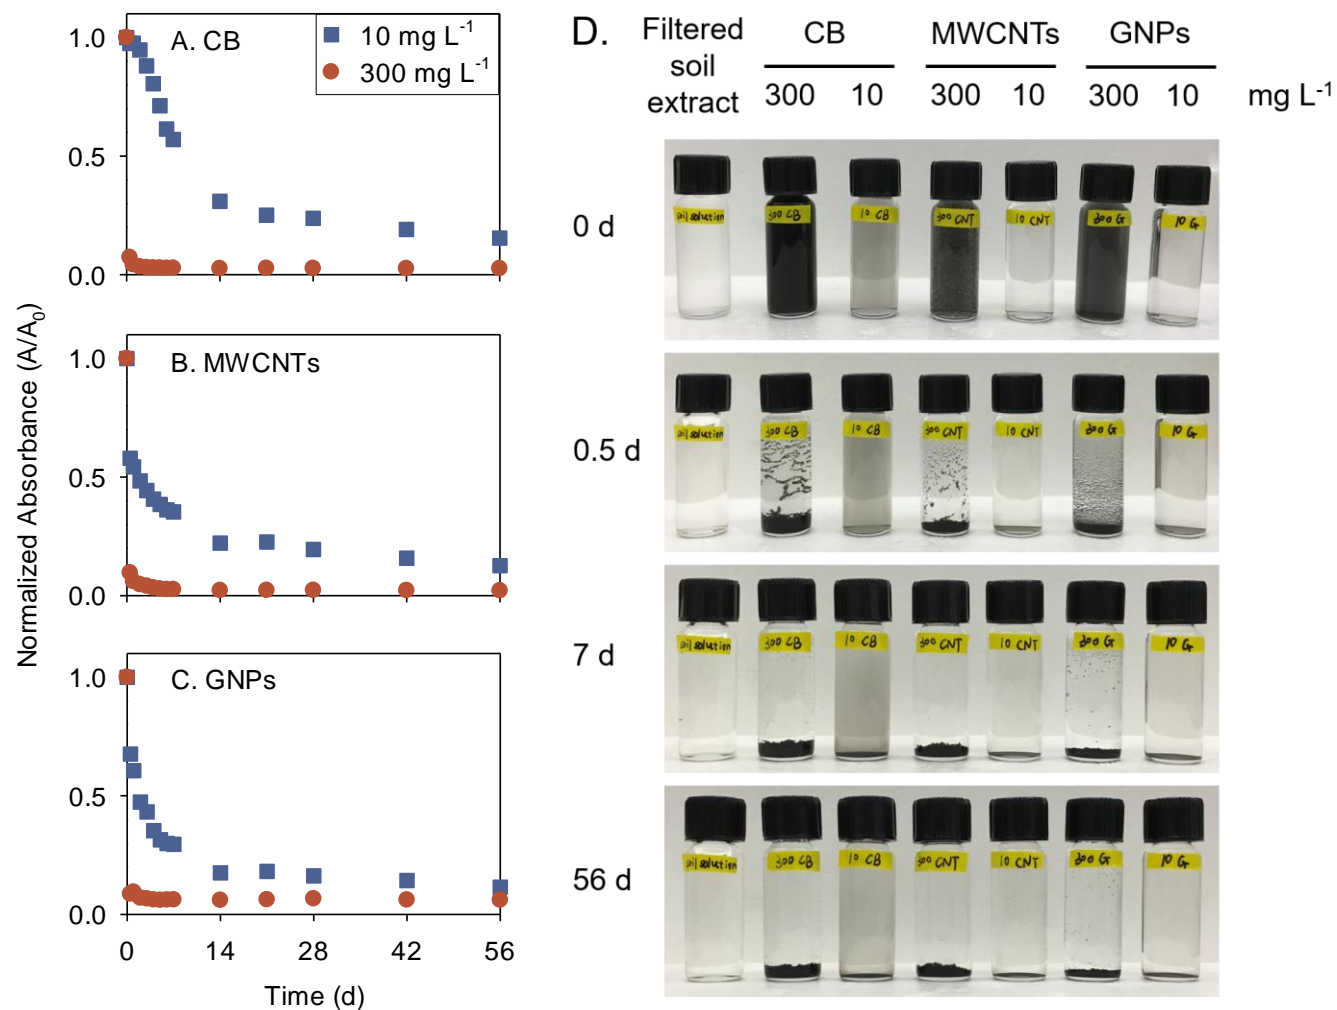

Figure S8. Stability of 10 or 300 mg L<sup>-1</sup> CNMs in the filtered soil extract as indicated by (A–C) the time course to 56 d of normalized nanomaterial suspension absorbance at 600 nm ( $A/A_0$ , where  $A_0$  was at time 0 of the experiment; the suspension absorbance at 600 nm used as a proxy for suspended nanomaterial concentration), and as indicated visually (D) at  $t = 0, 0.5, 7$  or 56 days. CB = carbon black, MWCNTs = multi-walled carbon nanotubes, and GNPs = graphene nanoplatelets.



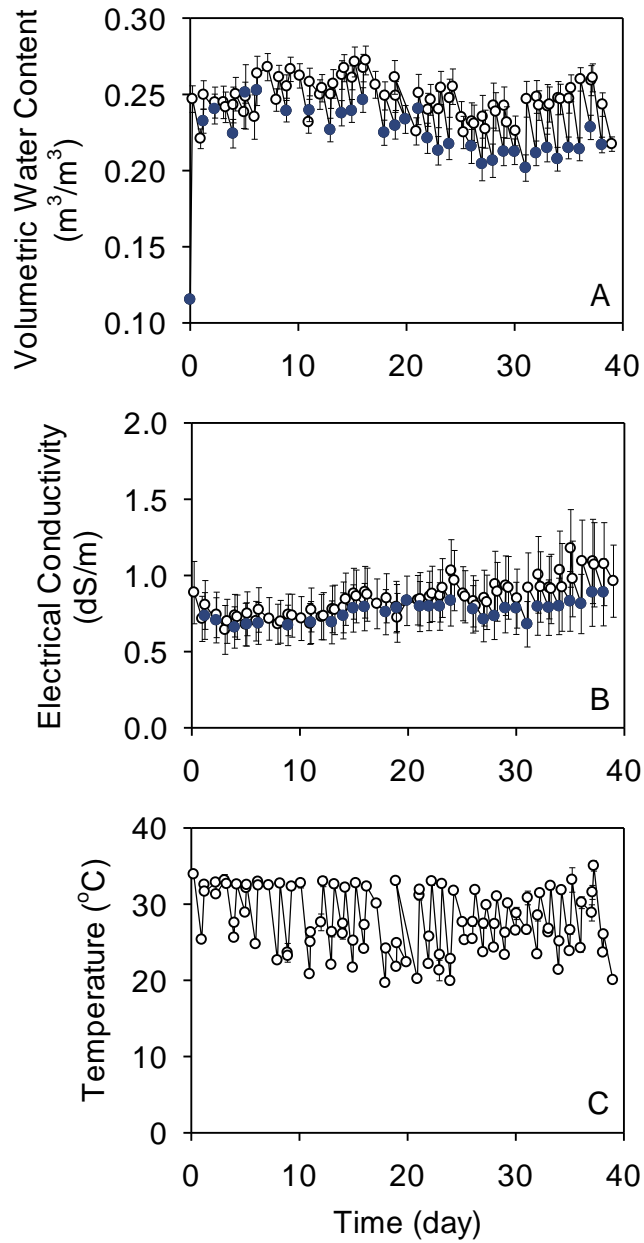

Figure S9. Soil environmental characteristics in planted soybean mesocosms over time, by *in situ* measurements (all circles; using Decagon Model 5TE sensors) in seven pots distributed across the treatments and replicates (see Methods): (A) volumetric water content, (B) electrical conductivity, and (C) temperature. Filled circles indicate that irrigation occurred immediately after the measurement. Error bars are  $\pm$ SE (n = 7).

## REFERENCES

1. Jones, D.; Willett, V., Experimental evaluation of methods to quantify dissolved organic nitrogen (DON) and dissolved organic carbon (DOC) in soil. *Soil Biol Biochem* **2006**, *38* (5), 991-999.
2. Weil, R. R.; Brady, N. C., *The Nature and Properties of Soils*. Pearson Education: 2016; pp 161-171.
3. Ge, Y.; Priester, J. H.; Mortimer, M.; Chang, C. H.; Ji, Z.; Schimel, J. P.; Holden, P. A., Long-term effects of multiwalled carbon nanotubes and graphene on microbial communities in dry soil. *Environ Sci Technol* **2016**, *50* (7), 3965-74.
4. Mortimer, M.; Petersen, E. J.; Buchholz, B. A.; Orias, E.; Holden, P. A., Bioaccumulation of multiwall carbon nanotubes in *Tetrahymena thermophila* by direct feeding or trophic transfer. *Environ Sci Technol* **2016**, *50* (16), 8876-85.
5. Rhoades, J. D., Soluble salts<sup>1</sup>. In *Methods of Soil Analysis. Part 2. Chemical and Microbiological Properties*, Page, A. L., Ed. American Society of Agronomy, Soil Science Society of America: Madison, WI, 1982; pp 167-179.
6. U.S. Salinity Laboratory Staff. 1954. pH reading of saturated soil paste. p. 102. In: L. A. Richards (ed.) *Diagnosis and improvement of saline and alkali soils*. USDA Agricultural Handbook 60. U.S. Government Printing Office, Washington, D.C.
7. Knudsen, D.; Peterson, G. A.; Pratt, P. F., Lithium, sodium, and potassium. In *Methods of Soil Analysis. Part 2. Chemical and Microbiological Properties*, Page, A. L., Ed. American Society of Agronomy, Soil Science Society of America: Madison, WI, 1982; pp 225-246.
8. Soltanpour, P. N.; Jones, J. B.; Workman, S. M., Optical emission spectrometry<sup>1</sup>. In *Methods of Soil Analysis. Part 2. Chemical and Microbiological Properties*, Page, A. L., Ed. American Society of Agronomy, Soil Science Society of America: Madison, WI, 1982; pp 29-65.
9. U.S. Salinity Laboratory Staff. 1954. Carbonate and bicarbonate by titration with acid. p. 98. In: L. A. Richards (ed.) *Diagnosis and improvement of saline and alkali soils*. USDA Agricultural Handbook 60. U.S. Government Printing Office, Washington, D.C.
10. AOAC Official Method 972.43, Microchemical determination of carbon, hydrogen, and nitrogen, Automated Method, in *Official Methods of Analysis of AOAC International*, 16th Edition (1997), Chapter 12, pp. 5-6, AOAC International, Arlington, VA.
11. Hofer, S., Determination of ammonia (salicylate) in 2M KCl soil extracts by flow injection analysis. *QuikChem Method 12-107-06-2-A. Lachat Instruments, Loveland, CO. 2003*.
12. Keeney, D. R.; Nelson, D. W., Nitrogen—Inorganic forms<sup>1</sup>. In *Methods of Soil Analysis. Part 2. Chemical and Microbiological Properties*, American Society of Agronomy, Soil Science Society of America: Madison, WI, 1982; pp 643-698.
13. Knepel, K., Determination of nitrate in 2M KCl soil extracts by flow injection analysis. *QuikChem Method 12-107-04-1-B. Lachat Instruments, Loveland, CO. 2003*.
14. Olsen, S. R.; Sommers, L. E., Phosphorus. In *Methods of Soil Analysis. Part 2. Chemical and Microbiological Properties*, Page, A. L., Ed. American Society of Agronomy, Soil Science Society of America: Madison, WI, 1982; pp 403-430.
15. Prokopy, W. R., Phosphorus in 0.5 M sodium bicarbonate soil extracts. *QuikChem Method 12-115-01-1-B. Lachat Instruments, Milwaukee, WI. 1995*.

16. Thomas, G. W., Exchangeable cations. In *Methods of Soil Analysis. Part 2. Chemical and Microbiological Properties*, Page, A. L., Ed. American Society of Agronomy, Soil Science Society of America: Madison, WI, 1982; pp 159-165.
17. Nelson, D. W.; Sommers, L. E., Total carbon, organic carbon, and organic matter. In *Methods of Soil Analysis Part 3—Chemical Methods*, Sparks, D. L.; Page, A. L.; Helmke, P. A.; Loeppert, R. H., Eds. Soil Science Society of America, American Society of Agronomy: Madison, WI, 1996; pp 961-1010.
18. Lindsay, W. L.; Norvell, W. A., Development of a DTPA soil test for zinc, iron, manganese, and copper. *Soil Sci. Soc. Amer. J.* **1978**, *42*, 421-428.
19. Sah, R. N.; Miller, R. O., Spontaneous reaction for acid dissolution of biological tissues in closed vessels. *Anal Chem* **1992**, *64* (2), 230-3.
20. Sheldrick, B.; Wang, C., Particle size distribution. *Soil sampling and methods of analysis* **1993**, 499-511.
